# Supplementary material for: Engineering the synthesized colloidal CuInS2 passivation layer in interface modification for CdS/CdSe quantum dot solar cells
Source: Royal Society of Chemistry journal article supplement (doi:10.1039/d2dt02555h), 2022-01-01
Supplement: d2dt02555h1.pdf [file d2dt02555h1.pdf]

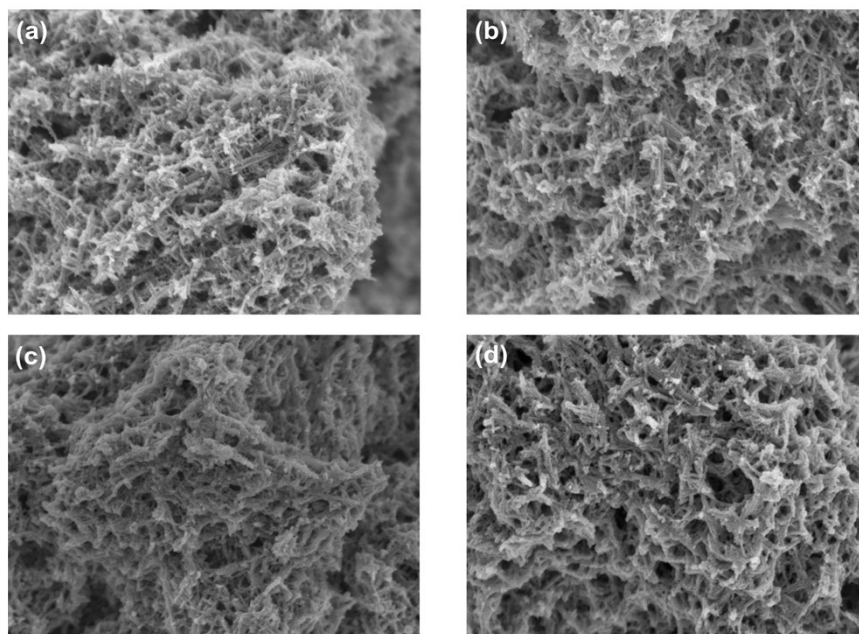

Fig. S1 Top view FESEM image of (a)TiO<sub>2</sub>, (b) TiO<sub>2</sub>/CdS, (c) TiO<sub>2</sub>/CdS/CdSe, (d) TiO<sub>2</sub>/CdS/CIS

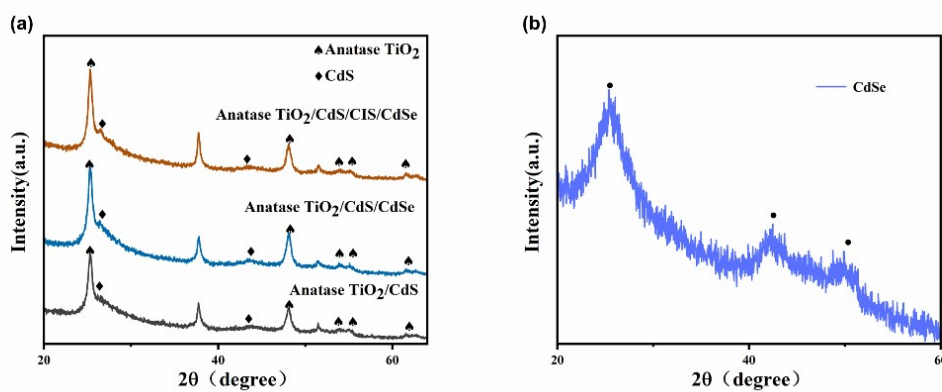

Fig. S2. (a) XRD pattern of the CdS, CdS/CdSe, CdS/CIS/CdSe QDs sensitized TiO<sub>2</sub> films, (b) XRD pattern of pure QDs.

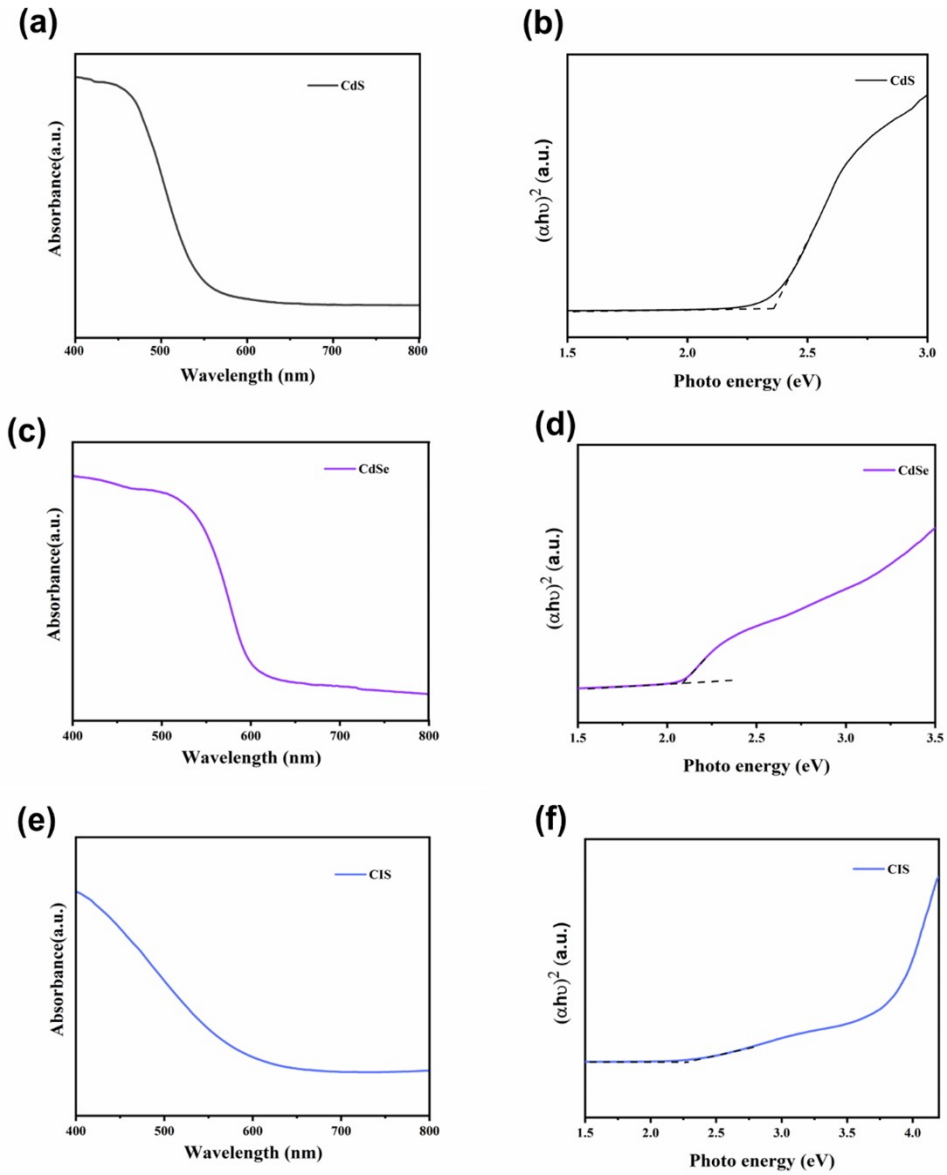

Fig. S3 (a) (c) and (e): UV-vis absorption light spectra and (b) (d) (f): absorption and bandgap conversion curves of pure CdS, CdSe, and CIS QD films on FTO substrate.

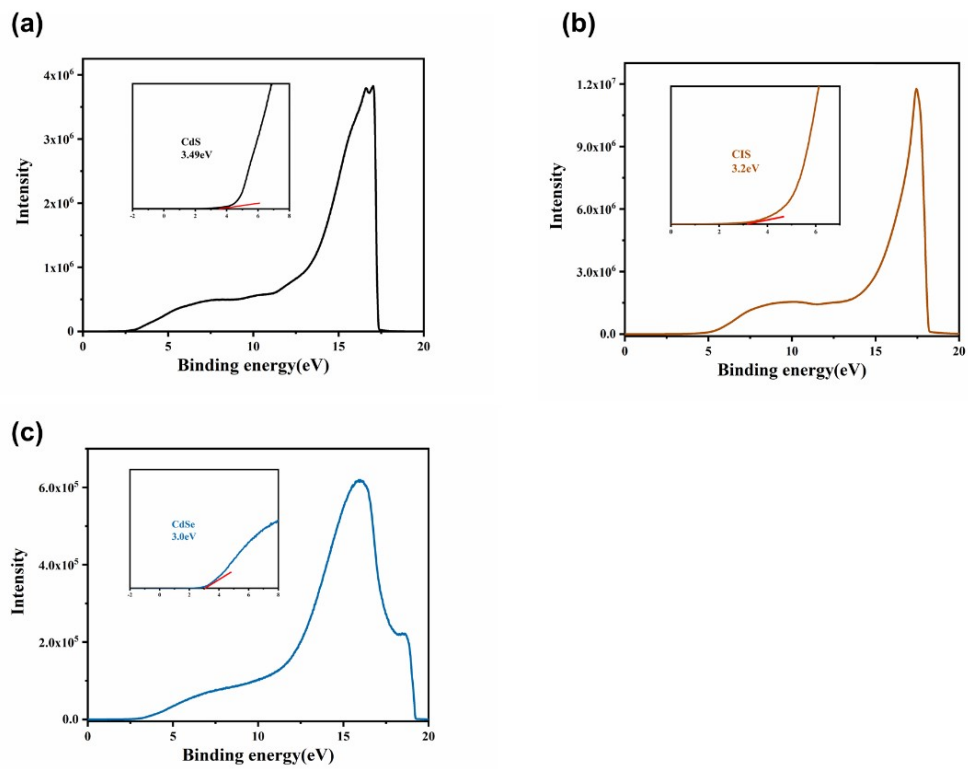

Fig. S4 UPS spectra for (a) CdS, (b) CIS and (c) CdSe QDs.

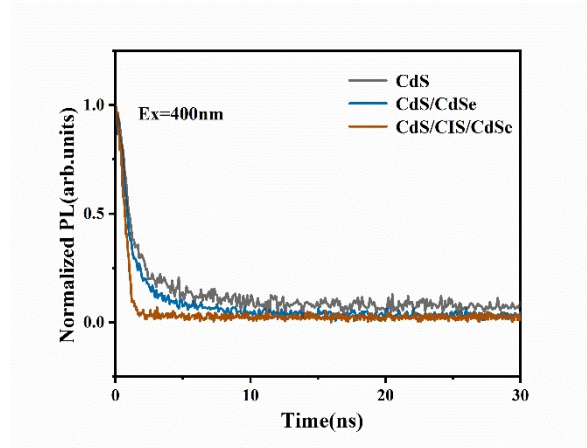

Fig. S5 Results of Time-resolved photoluminescence (TRPL) spectroscopy for CdS, CdS/CdSe and CdS/CIS/CdSe QDs.

Table S1 Fitting parameters of photoluminescence decay for the investigated CdS, CdS/CdSe and CdS/CIS/CdSe QDs. The average lifetimes( $\tau_{av}$ ) of the samples are calculated based on this equation.

$$\tau_{av} = (A_1 \tau_1 + A_2 \tau_2) / (A_1 + A_2)$$

| Sample       | $A_1$ | $A_2$ | $\tau_1$ | $\tau_2$ | $R^2$ | $\tau_{av}$ |
|--------------|-------|-------|----------|----------|-------|-------------|
| CdS          | 0.94  | 0.07  | 1.16     | 14.58    | 0.956 | 7.64        |
| CdS/CdSe     | 0.98  | 0.07  | 1.03     | 10.58    | 0.976 | 5.07        |
| CdS/CIS/CdSe | 1.11  | 0.012 | 0.73     | 3.39     | 0.943 | 0.86        |
